# Supplementary material for: Integrated genomic analysis of the stemness index signature of mRNA expression predicts lung adenocarcinoma prognosis and immune landscape
Source: PeerJ. 2025 Feb 13;13:e18945. doi: 10.7717/peerj.18945 (PMC11830367; doi:10.7717/peerj.18945)
Supplement: Supplemental Information 1 [file peerj-13-18945-s001.xls]

## Sheet: Sheet1
ITEM TO CHECK	IMPORTANCE	CHECKLIST
EXPERIMENTAL DESIGN
Definition of experimental and control groups	E	page6line 140-143
Number within each group	E	page6line 140-143
Assay carried out by core lab or investigator's lab?	D	Not Applicable
Acknowledgement of authors' contributions	D	Not Applicable
SAMPLE
Description	E	page7line153-158
Volume/mass of sample processed	D	Not Applicable
Microdissection or macrodissection	E	page7line153-158
Processing procedure	E	page7line153-158
If frozen - how and how quickly?	E	page7line153-158
If fixed - with what, how quickly?	E	page7line153-158
Sample storage conditions and duration (especially for FFPE samples)	E	page7line153-158
NUCLEIC ACID EXTRACTION
Procedure and/or instrumentation	E	page7line153-158
Name of kit and details of any modifications	E	page7line153-158
Source of additional reagents used	D	Not Applicable
Details of DNase or RNAse treatment	E	page7line153-158
Contamination assessment (DNA or RNA)	E	page7line153-158
Nucleic acid quantification	E	page7line153-158
Instrument and method	E	page7line153-158
Purity (A260/A280)	D	Not Applicable
Yield	D	Not Applicable
RNA integrity method/instrument	E	page7line153-158
RIN/RQI or Cq of 3' and 5' transcripts	E	page7line153-158
Electrophoresis traces	D	Not Applicable
Inhibition testing (Cq dilutions, spike or other)	E	page7line153-158
REVERSE TRANSCRIPTION
Complete reaction conditions	E	page7line153-158
Amount of RNA and reaction volume	E	page7line153-158
Priming oligonucleotide (if using GSP) and concentration	E	page7line153-158
Reverse transcriptase and concentration	E	page7line153-158
Temperature and time	E	page7line153-158
Manufacturer of reagents and catalogue numbers	D	Not Applicable
Cqs with and without RT	D*	Not Applicable
Storage conditions of cDNA	D	Not Applicable
qPCR TARGET INFORMATION
If multiplex, efficiency and LOD of each assay.	E	page7line153-158
Sequence accession number	E	page7line153-158
Location of amplicon	D	Not Applicable
Amplicon length	E	page7line153-158
In silico specificity screen (BLAST, etc)	E	page7line153-158
Pseudogenes, retropseudogenes or other homologs?	D	Not Applicable
Sequence alignment	D	Not Applicable
Secondary structure analysis of amplicon	D	Not Applicable
Location of each primer by exon or intron (if applicable)	E	page7line153-158
What splice variants are targeted?	E	page7line153-158
qPCR OLIGONUCLEOTIDES
Primer sequences	E	page7line153-158
RTPrimerDB Identification Number	D	Not Applicable
Probe sequences	D**	Not Applicable
Location and identity of any modifications	E	page7line153-158
Manufacturer of oligonucleotides	D	Not Applicable
Purification method	D	Not Applicable
qPCR PROTOCOL
Complete reaction conditions	E	page7line153-158
Reaction volume and amount of cDNA/DNA	E	page7line153-158
Primer, (probe), Mg++ and dNTP concentrations	E	page7line153-158
Polymerase identity and concentration	E	page7line153-158
Buffer/kit identity and manufacturer	E	page7line153-158
Exact chemical constitution of the buffer	D	Not Applicable
Additives (SYBR Green I, DMSO, etc.)	E	page7line153-158
Manufacturer of plates/tubes and catalog number	D	Not Applicable
Complete thermocycling parameters	E	page7line153-158
Reaction setup (manual/robotic)	D	Not Applicable
Manufacturer of qPCR instrument	E	page7line153-158
qPCR VALIDATION
Evidence of optimisation (from gradients)	D	Not Applicable
Specificity (gel, sequence, melt, or digest)	E	page7line153-158
For SYBR Green I, Cq of the NTC	E	page7line153-158
Standard curves with slope and y-intercept	E	page7line153-158
PCR efficiency calculated from slope	E	page7line153-158
Confidence interval for PCR efficiency or standard error	D	Not Applicable
r2 of standard curve	E	page7line153-158
Linear dynamic range	E	page7line153-158
Cq variation at lower limit	E	page7line153-158
Confidence intervals throughout range	D	Not Applicable
Evidence for limit of detection	E	page7line153-158
If multiplex, efficiency and LOD of each assay.	E	page7line153-158
DATA ANALYSIS
qPCR analysis program (source, version)	E	page7line153-158
Cq method determination	E	page7line153-158
Outlier identification and disposition	E	page7line153-158
Results of NTCs	E	page7line153-158
Justification of number and choice of reference genes	E	page7line153-158
Description of normalisation method	E	page7line153-158
Number and concordance of biological replicates	D	Not Applicable
Number and stage (RT or qPCR) of technical replicates	E	page7line153-158
Repeatability (intra-assay variation)	E	page7line153-158
Reproducibility (inter-assay variation, %CV)	D	Not Applicable
Power analysis	D	Not Applicable
Statistical methods for result significance	E	page7line153-158
Software (source, version)	E	page7line153-158
Cq or raw data submission using RDML	D	Not Applicable
Table 1. MIQE checklist for authors, reviewers and editors. All essential information (E) must be submitted with the manuscript. Desirable
information (D) should be submitted if available. If using primers obtained from RTPrimerDB, information on qPCR target, oligonucleotides,
protocols and validation is available from that source.
*: Assessing the absence of DNA using a no RT assay is essential when first extracting RNA. Once the sample has been validated as
RDNA-free, inclusion of a no-RT control is desirable, but no longer essential.
**: Disclosure of the probe sequence is highly desirable and strongly encouraged. However, since not all commercial pre-designed assay
vendors provide this information, it cannot be an essential requirement. Use of such assays is advised against.
